# Supplementary material for: Correlative 3D x-ray fluorescence and ptychographic tomography of frozen-hydrated green algae
Source: PubMed Central journal article supplement — Sci Adv. 2018 Nov 2;4(11):eaau4548. doi: 10.1126/sciadv.aau4548 (PMC6214637; doi:10.1126/sciadv.aau4548), 2018-11-02
Supplement: aau4548_SM.pdf [file aau4548_SM.pdf]

## Supplementary Materials for

### Correlative 3D x-ray fluorescence and ptychographic tomography of frozen-hydrated green algae

Junjing Deng, Yuan Hung Lo, Marcus Gallagher-Jones, Si Chen, Alan Pryor Jr., Qiaoling Jin, Young Pyo Hong,  
Youssef S. G. Nashed, Stefan Vogt, Jianwei Miao\*, Chris Jacobsen\*

\*Corresponding author. Email: [miao@physics.ucla.edu](mailto:miao@physics.ucla.edu) (J.M.); [cjacobsen@anl.gov](mailto:cjacobsen@anl.gov) (C.J.)

Published 2 November 2018, *Sci. Adv.* **4**, eaau4548 (2018)  
DOI: 10.1126/sciadv.aau4548

#### The PDF file includes:

Fig. S1. Experimental phosphorus channel x-ray fluorescence projections.  
Fig. S2. Experimental calcium channel x-ray fluorescence projections.  
Fig. S3. Experimental sulfur channel x-ray fluorescence projections.  
Fig. S4. Experimental chlorine channel x-ray fluorescence projections.  
Fig. S5. Experimental potassium channel x-ray fluorescence projections.  
Fig. S6. Experimental ptychographic projections.  
Fig. S7. Resolution of 2D ptychographic projections.  
Legend for movie S1

#### Other Supplementary Material for this manuscript includes the following:

(available at [advances.sciencemag.org/cgi/content/full/4/11/eaau4548/DC1](https://advances.sciencemag.org/cgi/content/full/4/11/eaau4548/DC1))

Movie S1 (.mov format). Reconstructed x-ray fluorescence volume of *C. reinhardtii*.

## SUPPLEMENTARY FIGURES

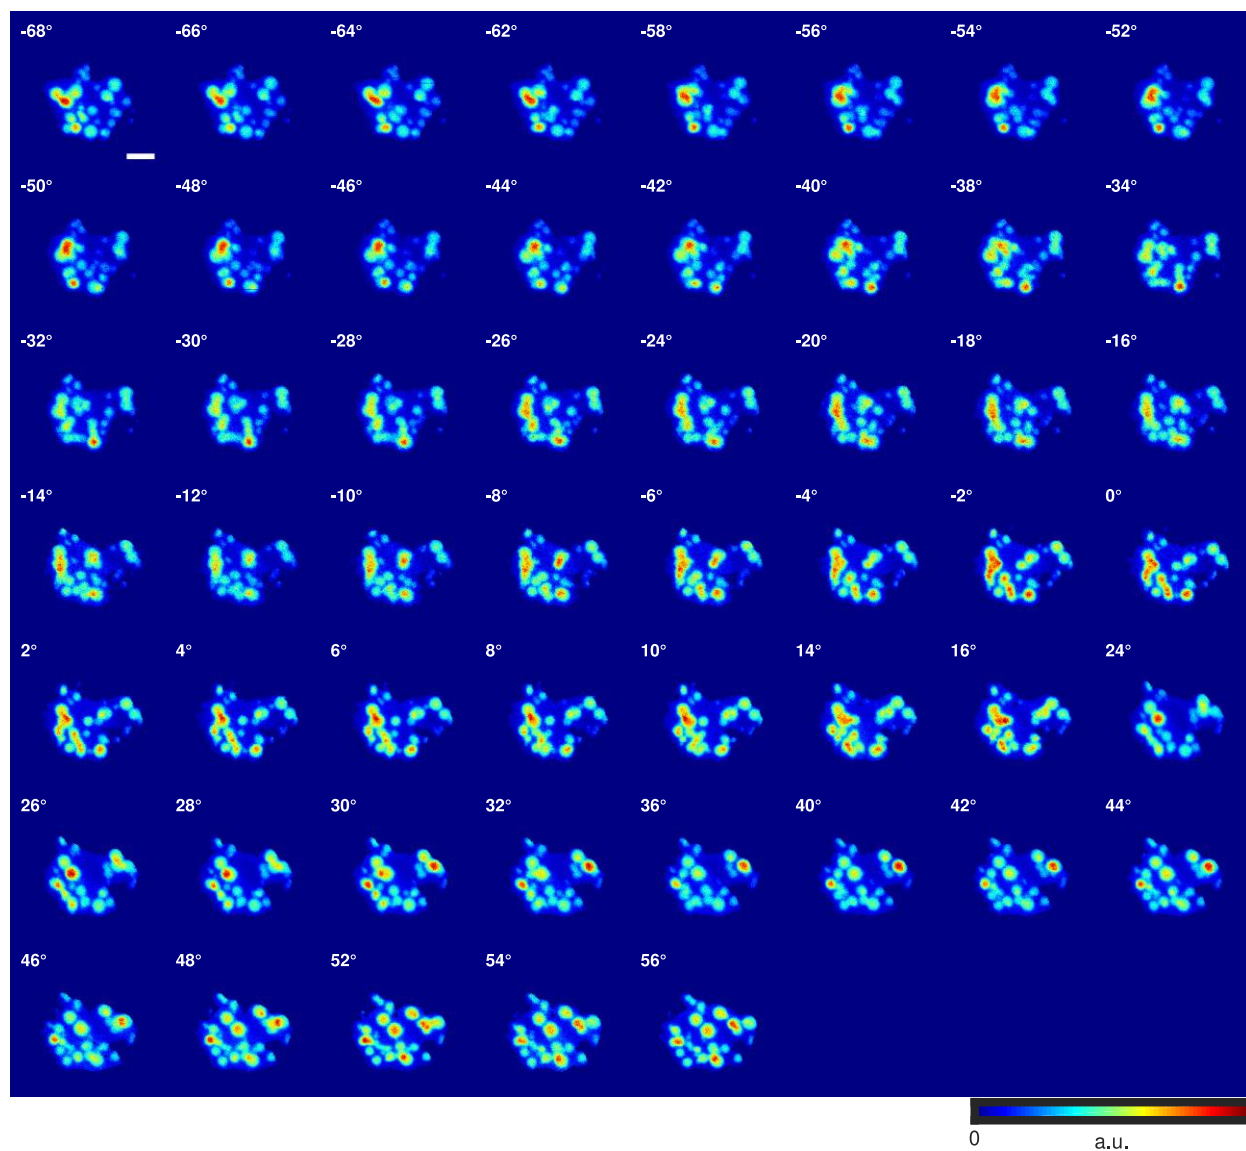

**Fig. S1. Experimental phosphorus channel x-ray fluorescence projections.** All 53 background-subtracted and aligned phosphorus channel X-ray fluorescence microscopy projections used as input for GENFIRE reconstruction, with tilt range from  $-68^\circ$  to  $56^\circ$ . Scale bar,  $2\ \mu\text{m}$ .

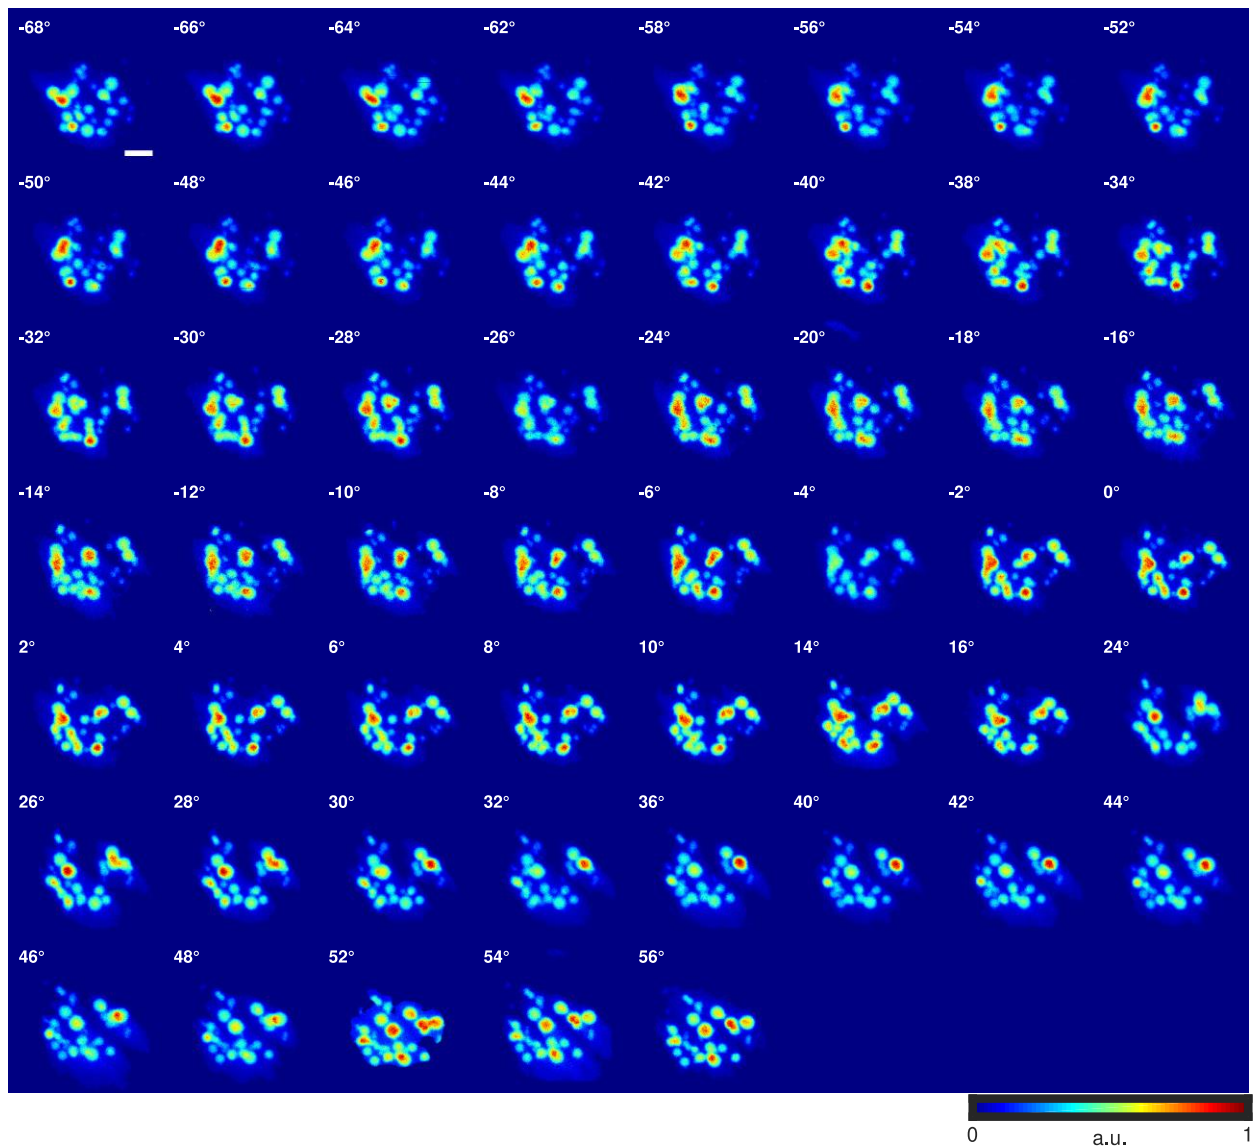

**Fig. S2. Experimental calcium channel x-ray fluorescence projections.** All 53 background-subtracted and aligned calcium channel X-ray fluorescence microscopy projections used as input for GENFIRE reconstruction, with tilt range from  $-68^\circ$  to  $56^\circ$ . Scale bar,  $2\ \mu\text{m}$ .

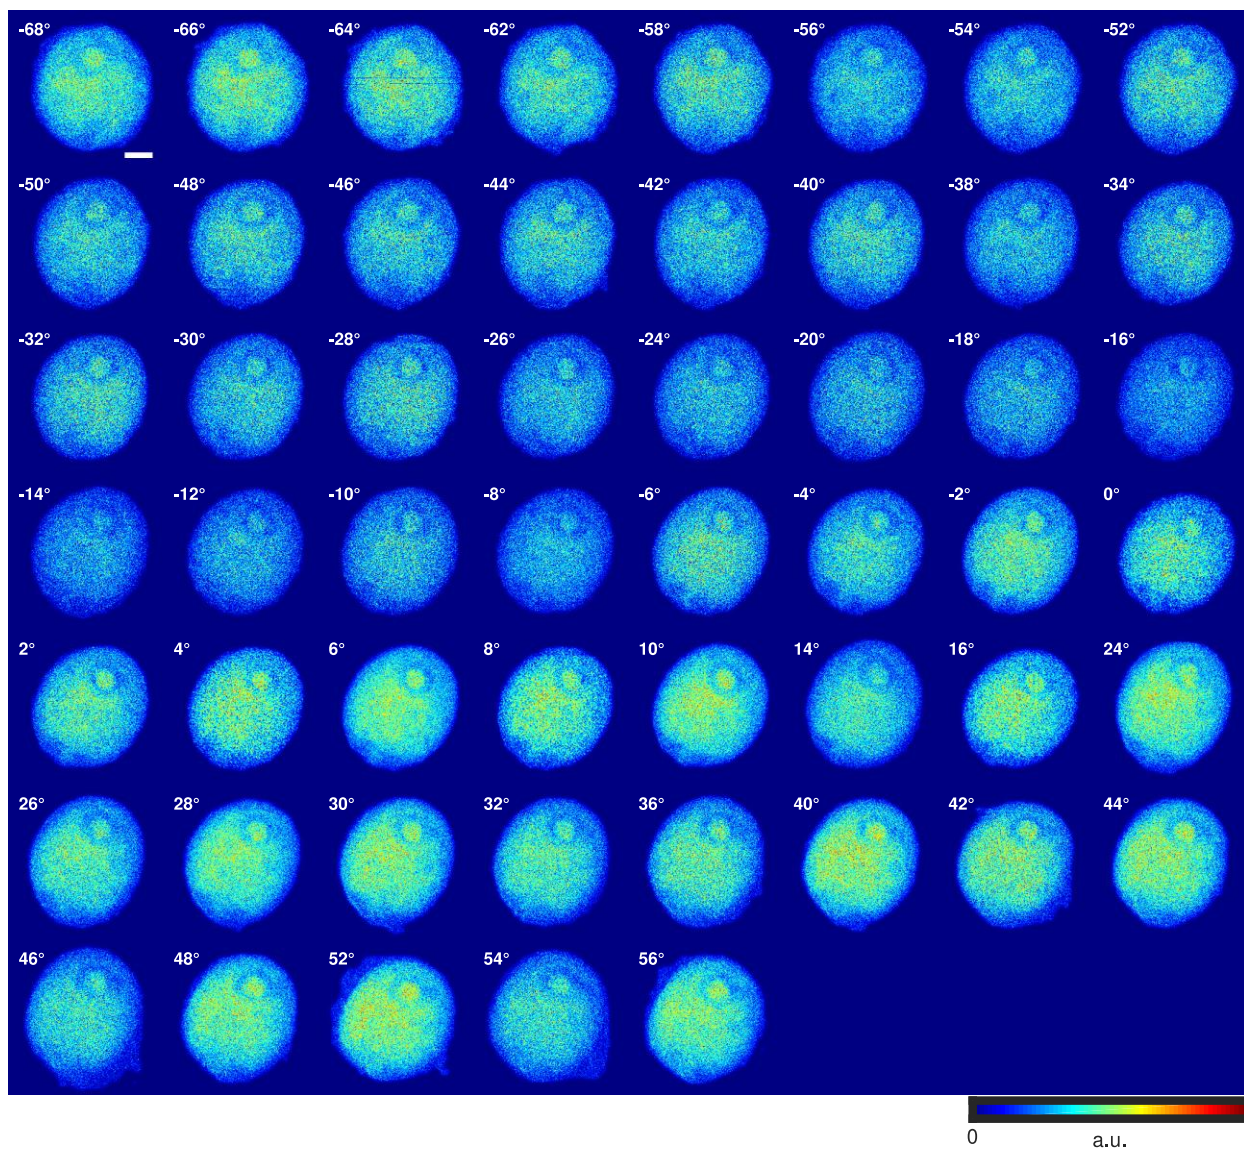

**Fig. S3. Experimental sulfur channel x-ray fluorescence projections.** All 53 background-subtracted and aligned sulfur channel X-ray fluorescence microscopy projections used as input for GENFIRE reconstruction, with tilt range from  $-68^\circ$  to  $56^\circ$ . Scale bar,  $2\ \mu\text{m}$ .



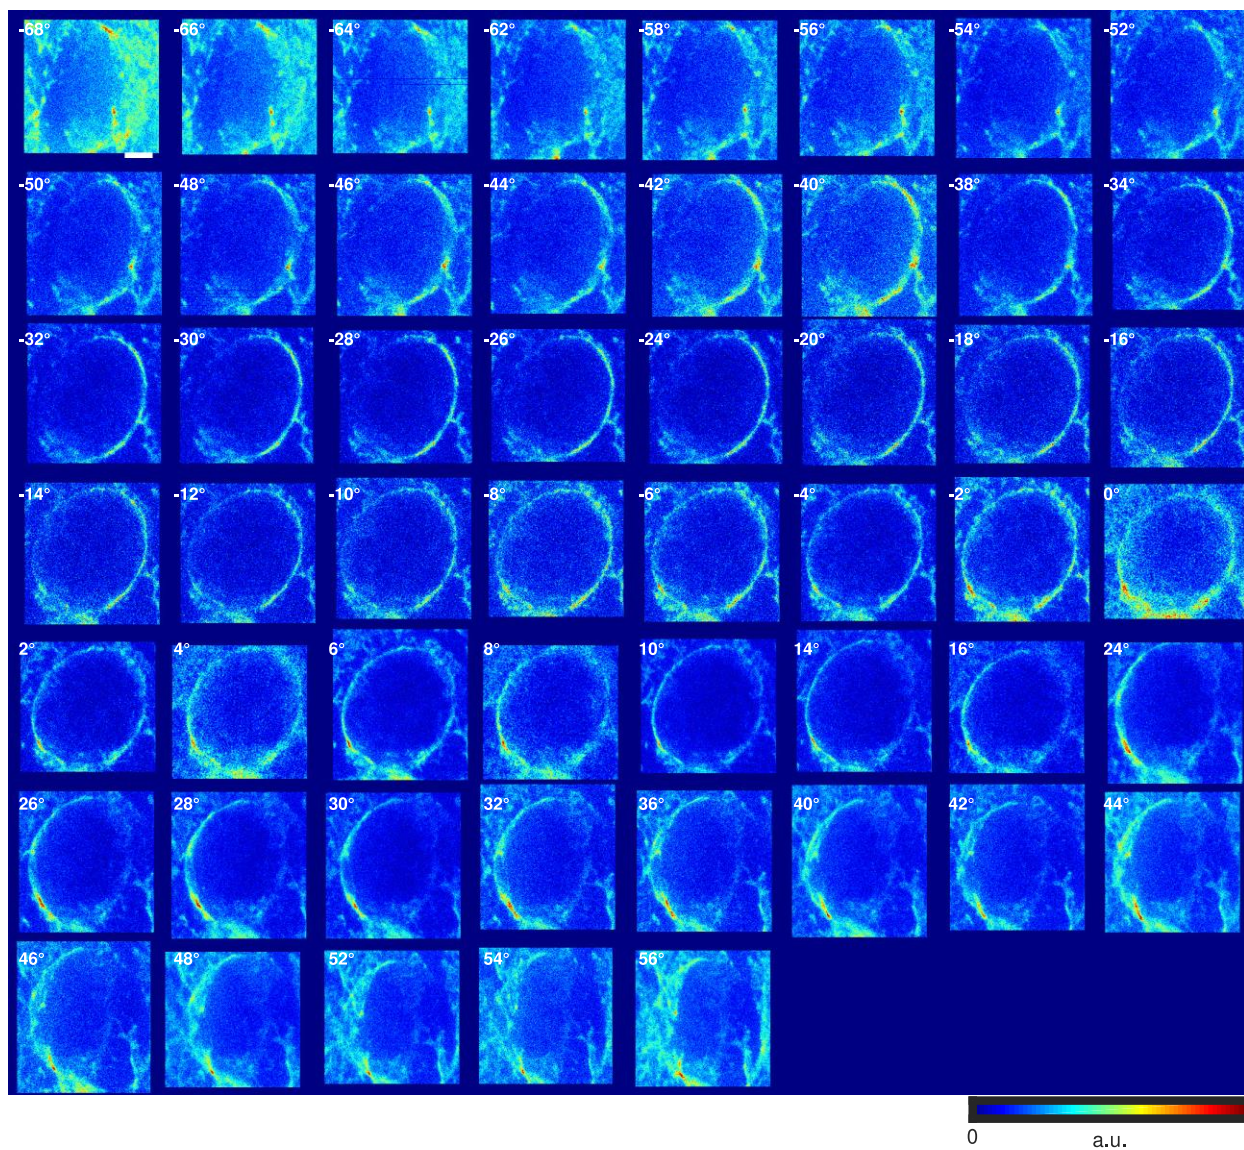

**Fig. S4. Experimental chlorine channel x-ray fluorescence projections.** All 53 aligned chlorine channel X-ray fluorescence microscopy projections used as input for GENFIRE reconstruction, with tilt range from  $-68^\circ$  to  $56^\circ$ . Scale bar,  $2\ \mu\text{m}$ .

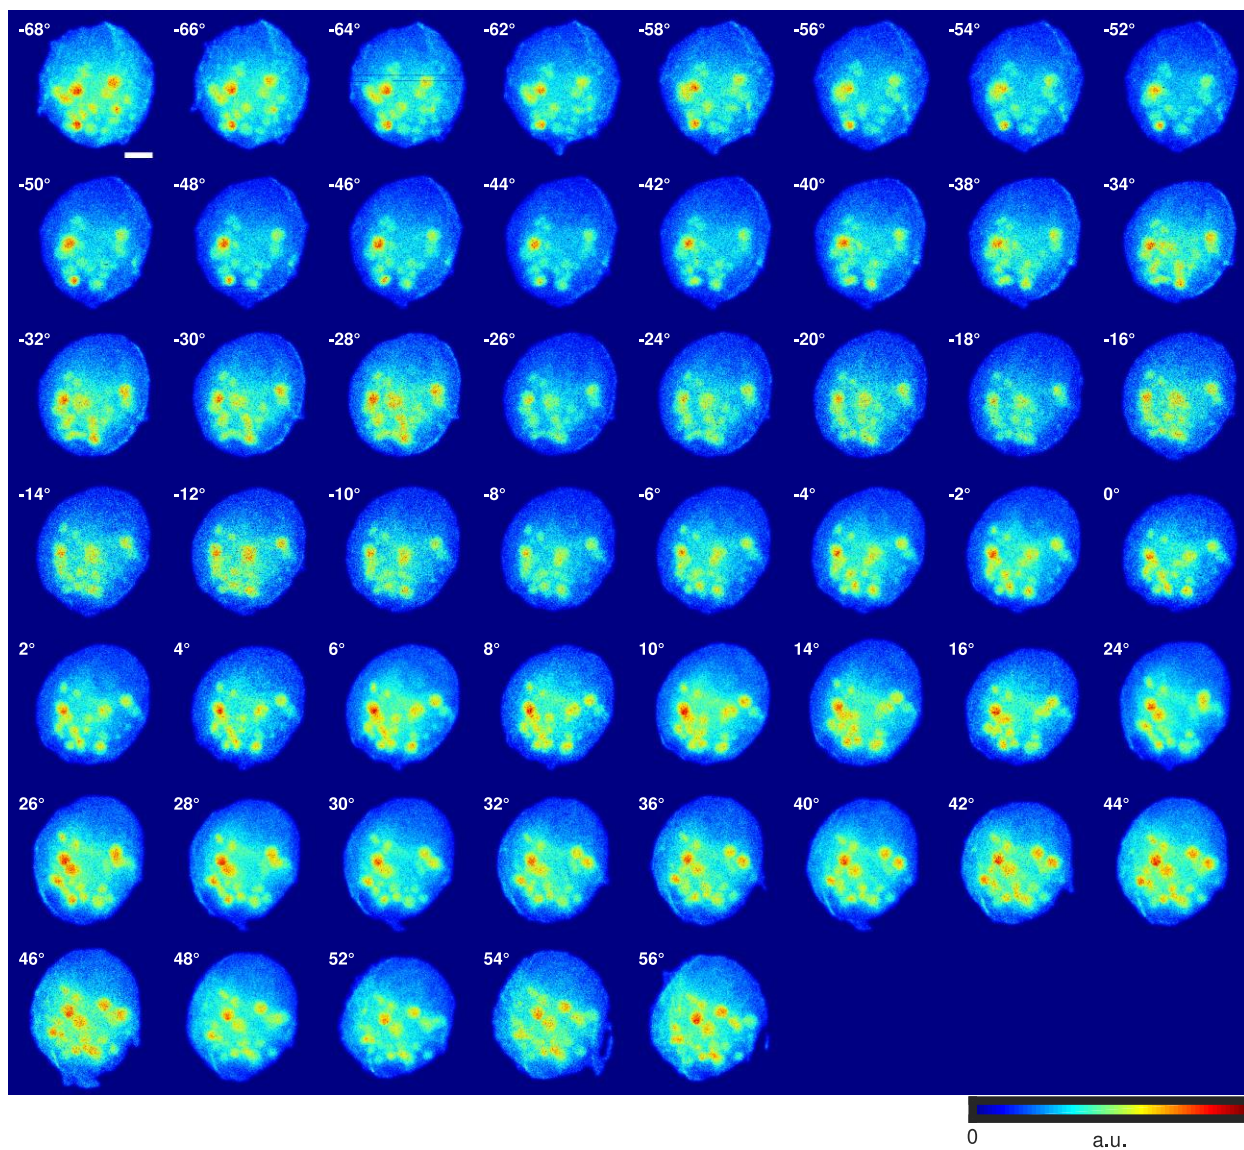

**Fig. S5. Experimental potassium channel x-ray fluorescence projections.** All 53 background-subtracted and aligned potassium channel X-ray fluorescence microscopy projections used as input for GENFIRE reconstruction, with tilt range from  $-68^\circ$  to  $56^\circ$ . Scale bar,  $2\ \mu\text{m}$ .



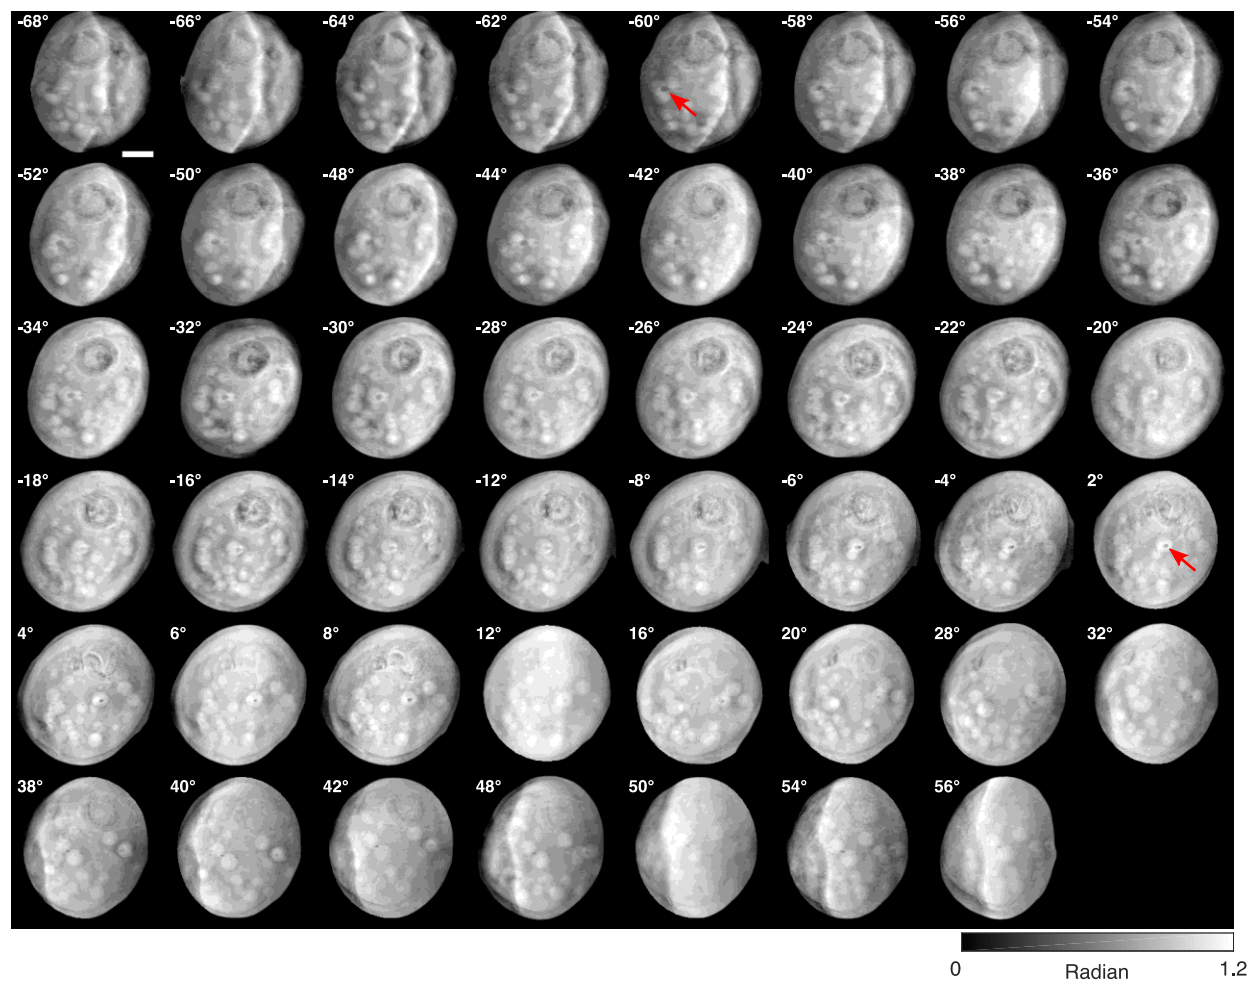

**Fig. S6. Experimental ptychographic projections.** All 47 background-subtracted and aligned ptychography phase projections used as input for GENFIRE reconstruction, with tilt range from  $-68^\circ$  to  $56^\circ$ . The red arrows highlight the X-ray-induced damage from accidental over-exposure at  $60^\circ$  (correspond to same viewing angle as Fig. 2c) and  $2^\circ$  projections. Scale bar,  $2\ \mu\text{m}$ .

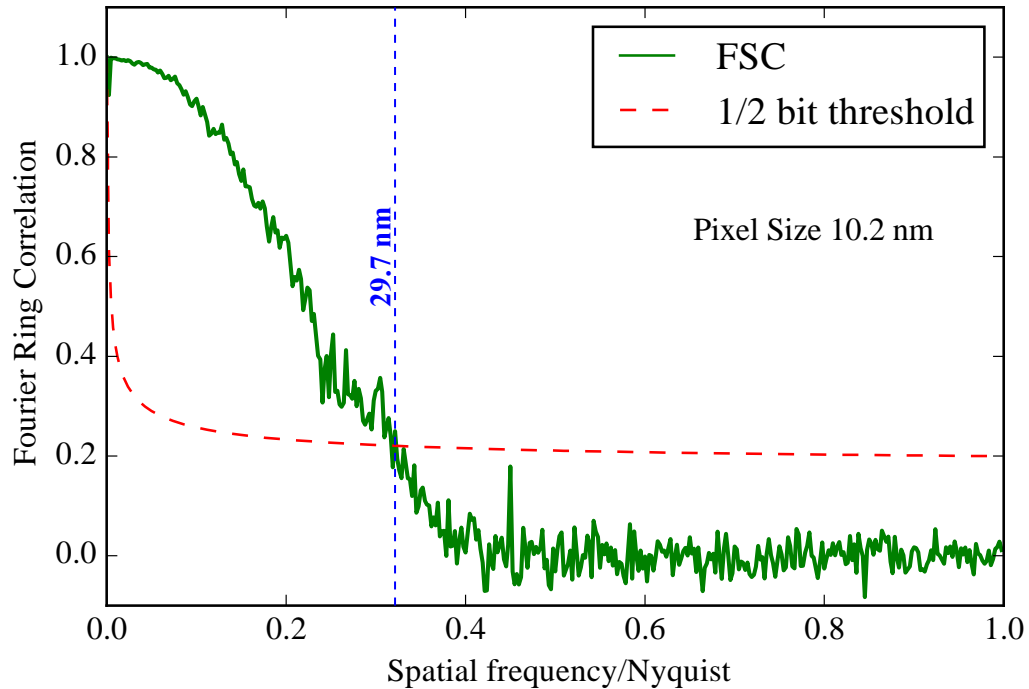

**Fig. S7. Resolution of 2D ptychographic projections.** Fourier ring correlation (FRC) of two identical ptychography projection measurements at zero degree, indicating a resolution of 29.7 nm using the half-bit criterion.

**Movie S1. Reconstructed x-ray fluorescence volume of *C. reinhardtii*.** Composite view of the reconstructed cellular volume, containing P (red), Ca (green), S (black), Cl (yellow) and K (blue) fluorescence signals. Distinct localization of fluorescence signals show 3D locations of various organelles such as pyrenoid and acidocalcisomes.
